# Supplementary material for: Thromboelastography to Detect Hypercoagulability and Reduced Fibrinolysis in Coronavirus Disease 2019 Acute Respiratory Distress Syndrome Patients
Source: PubMed Central journal article supplement — Crit Care Explor. 2020 Sep 15;2(9):e0192. doi: 10.1097/CCE.0000000000000192 (PMC7498137; doi:10.1097/cce.0000000000000192), 2020-09-15
Supplement: cc9-2-e0192-s001.pdf [file cc9-2-e0192-s001.pdf]

Supplemental Table 1. Clinical Characteristics and Clinical Course

| Patient                                | 1                            | 2     | 3                              | 4       | 5                  | 6            | 7                            | 8             | 9                       | 10                      | Total (n=10)     |
|----------------------------------------|------------------------------|-------|--------------------------------|---------|--------------------|--------------|------------------------------|---------------|-------------------------|-------------------------|------------------|
| Age (yr)                               | 70                           | 72    | 39                             | 75      | 67                 | 54           | 49                           | 62            | 43                      | 54                      | 58 (49-70)       |
| Gender (male)                          | Male                         | Male  | Male                           | Male    | Male               | Male         | Male                         | Female        | Male                    | Female                  | 8 (80%)          |
| Chronic Conditions                     | CAD, HTN, DM, Morbid Obesity | HTN   | Smoker, Psoriasis, IC, Obesity | DM, HTN | CAD, Heart Failure | Obesity      | Morbid Obesity               | HTN           | Morbid Obesity          | DM, Morbid Obesity      | N/A              |
| BMI                                    | 36                           | 30    | 35                             | 21      | 34                 | 35           | 70                           | 29            | 41                      | 39                      | 35 (30-39)       |
| Days from symptom onset-ICU admission  | 9                            | 10    | 16                             | 6       | 12                 | 7            | 14                           | 12            | 7                       | 12                      | 11 (7-12)        |
| SOFA score                             | 2                            | 4     | 5                              | 4       | 3                  | 3            | 8                            | 4             | 5                       | 5                       | 4 (3-5)          |
| P/F ratio, ICU admission               | 213                          | 139   | 204                            | 268     | 189                | 150          | 64                           | 138           | 192                     | 113                     | 169.5 (138-204)  |
| Platelet Count (per mm <sup>3</sup> )  | 298                          | 502   | 273                            | 176     | 384                | 481          | 377                          | 241           | 83                      | 285                     | 291 (224-408)    |
| C-Reactive Protein (mg/L)              | 12.5                         | 25.1  | 31.3                           | 5.1     | 16.2               | 24.6         | 25.3                         | 28.9          | 14.3                    | 10.1                    | 20.4 (12.5-25.3) |
| Serum Ferritin (ng/mL)                 | 1,796                        | 4,749 | 3,368                          | 2,919   | 350                | 4,981        | 2,911                        | 1,796         | 7,518                   | 881                     | 2915 (1796-4749) |
| D-Dimer (mcg/mL)                       | 1                            | 4.5   | 13.1                           | 3.9     | 0.9                | 14.1         | 2.4                          | 1             | 1.8                     | 6.62                    | 3.15 (1-6.62)    |
| Creatine Kinase (u/L)                  | 31                           | 106   | 26                             | 977     | 69                 | 230          | 10,835                       | 34            | 168                     | 39                      | 87.5 (34-230)    |
| Fibrinogen (mg/dL)                     | 543                          | >1000 | N/A                            | N/A     | N/A                | 530          | 769                          | 676           | N/A                     | N/A                     | 676 (543-769)    |
| Lactate Dehydrogenase (U/L)            | 349                          | 359   | 741                            | 400     | 446                | 898          | 679                          | 490           | 538                     | 330                     | 468 (359-679)    |
| FiO <sub>2</sub> (%)                   | 40                           | 45    | 80                             | 35      | 40                 | 40           | 100                          | 70            | 50                      | 60                      | 48 (40-70)       |
| PEEP (cm H <sub>2</sub> O)             | 14                           | 7     | 14                             | 8       | 8                  | 10           | 20                           | 14            | 16                      | 14                      | 14 (8-15)        |
| Ventilatory Ratio                      | 1.68                         | 2.26  | 1.9                            | 1.1     | 1.3                | 2.02         | 2.61                         | 1.19          | 1.6                     | 1.81                    | 1.75 (1.27-2.08) |
| Ventilator Mode                        | VC                           | PRVC  | PRVC                           | PRVC    | PRVC               | VC           | VC                           | VC            | PRVC                    | VC                      |                  |
| Plateau Pressure (cm H <sub>2</sub> O) | 20                           | N/A   | 26                             | 17      | N/A                | 20           | 33                           | 23            | 30                      | 19                      | 22 (19-29)       |
| Ventilator Days                        | 2                            | 13    | 7                              | 21      | 8                  | 8            | 3                            | 15            | 19                      | 7                       | 8 (3-8)          |
| Prone positioning                      | No                           | No    | No                             | No      | No                 | No           | No                           | No            | No                      | No                      | 0                |
| Paralytics                             | No                           | No    | Yes                            | No      | No                 | No           | Yes                          | Yes           | Yes                     | No                      | 4 (40%)          |
| Vasopressor Support                    | No                           | Yes   | Yes                            | No      | Yes                | No           | Yes                          | Yes           | No                      | Yes                     | 6 (60%)          |
| Extrapulmonary Organ Failure           | No                           | No    | AKI                            | No      | No                 | AKI, CHF     | AKI                          | No            | No                      | AKI                     | 4 (40%)          |
| Renal Replacement Therapy              | No                           | No    | Yes                            | No      | No                 | Yes          | Yes                          | No            | No                      | No                      | 3 (30%)          |
| Medical Therapy                        | CQ, Tocilizumab              | CQ    | CQ, Alteplase, Steroids        | CQ      | CQ                 | CQ, Steroids | CQ, iNO, Steroids, Alteplase | iNO, Steroids | CQ, Steroids, Alteplase | CQ, Steroids, Alteplase | N/A              |
| ICU Length of Stay                     | 4                            | 15    | 11                             | 22      | 12                 | 8            | 3                            | 18            | 23                      | 10                      | 11.5 (7-19)      |
| Hospital Length of Stay                | 12                           | 18    | 20                             | NR      | 24                 | 8            | 3                            | 28            | NR                      | 14                      | 16 (9-23)        |
| Outcome                                | Alive                        | Alive | Alive                          | Alive   | Alive              | Dead         | Dead                         | Alive         | Alive                   | Alive                   | 2 (20%)          |

Table 1: Clinical Characteristics and Clinical Course. Demographic, laboratory and ventilatory data for patients with COVID-19-associated respiratory failure evaluated with TEG. AKI: Acute Kidney Injury, CAD: Coronary Artery Disease, CQ: Chloroquine, HTN: Hypertension, DM: Diabetes Mellitus, IC: Immunocompromised, iNO: Inhaled Nitric Oxide. Totals given as n (percentage) or median (interquartile range); NR = not reached/ongoing
