# Supplementary material for: Thromboelastography to Detect Hypercoagulability and Reduced Fibrinolysis in Coronavirus Disease 2019 Acute Respiratory Distress Syndrome Patients
Source: PubMed Central journal article supplement — Crit Care Explor. 2020 Sep 15;2(9):e0192. doi: 10.1097/CCE.0000000000000192 (PMC7498137; doi:10.1097/cce.0000000000000192), 2020-09-15
Supplement: cc9-2-e0192-s002.pdf [file cc9-2-e0192-s002.pdf]

**Supplemental Table 2: Coagulation and TEG Indices**

| Patient                                                           | 1                     | 2              | 3           | 4              | 5                    | 6              | 7              | 8              | 9    | 10             | total     |                    |
|-------------------------------------------------------------------|-----------------------|----------------|-------------|----------------|----------------------|----------------|----------------|----------------|------|----------------|-----------|--------------------|
| Days from ICU Admission to TEG                                    | 1                     | 11             | 0           | 3              | 3                    | 6              | 2              | 1              | 0    | 6              | 2.5 (1-6) |                    |
| Prophylactic or Treatment Anticoagulation during Hospitalization? | Plavix, LMWH, ppx     | LMWH, ppx      | Heparin, tx | LMWH, ppx      | Plavix, Apixaban, tx | Heparin, ppx   | Heparin, ppx   | LMWH, ppx      | None | LMWH, ppx      | N/A       |                    |
| Heparin product at time of TEG                                    | No                    | Yes, corrected | No          | Yes, corrected | Yes, corrected       | Yes, corrected | Yes, corrected | Yes, corrected | No   | Yes, corrected | 8 (80%)   |                    |
| Initial TEG Values                                                | R-time (minutes)      | 3.6            | 5.8         | 6.8            | 4.3                  | 7.6            | 3.4            | 13.4           | 3.1  | 4.3            | 4.8       | 4.45 (3.6-5.8)     |
|                                                                   | K-time (minutes)      | 1              | 1           | 1.3            | 1                    | 1.2            | 0.9            | 2.7            | 0.8  | 2.1            | 1         | 1 (1-1.3)          |
|                                                                   | Alpha angle (degree)  | 78.5           | 78.7        | 75.1           | 78.3                 | 77.9           | 79.4           | 64             | 81   | 69.6           | 78.2      | 78.25 (75.1-78.7)  |
|                                                                   | Max amplitude (mm)    | 75.4           | 74.5        | 74.8           | 71                   | 72.9           | 69.3           | 72             | 74.4 | 52             | 68.5      | 71.95 (68.5-74.5)  |
|                                                                   | Lysis, 30 minutes (%) | 4.7            | 0.1         | 0              | 3                    | 0.1            | 1.5            | 0              | 1.4  | 0              | 0         | 0.75 (0-2.6)       |
|                                                                   | Coagulation Index     | 1.8            | 3.1         | 2.2            | 3.6                  | 1.7            | 4.1            | 3.9            | 5.1  | 0.2            | 3.1       | 2.8 (1.8-3.6)      |
| Post-tPA Values                                                   | R-time (minutes)      |                |             | 7.2            |                      |                |                | 3.2            |      | 4.7            | 8         | 5.95 (3.58-7.8)    |
|                                                                   | K-time (minutes)      |                |             | 1.2            |                      |                |                | 0.8            |      | 1.9            | 1.5       | 1.35 (0.9-1.8)     |
|                                                                   | Alpha angle (degree)  |                |             | 76.8           |                      |                |                | 80.9           |      | 70.5           | 73.3      | 75.05 (71.2-79.88) |
|                                                                   | Max amplitude (mm)    |                |             | 70             |                      |                |                | 72.8           |      | 55.3           | 66.4      | 68.2 (58.08-72.1)  |
|                                                                   | Lysis, 30 minutes (%) |                |             | 1              |                      |                |                | 0.8            |      | 0              | 0.7       | 0.75 (0.18-0.95)   |
|                                                                   | Coagulation Index     |                |             | 1.4            |                      |                |                | 4.8            |      | 0.6            | 0.1       | 1 (0.23-3.95)      |

**Supplemental Table 2: Coagulation and TEG Indices.** TEG parameters including measures of clot time, strength, lysis, and coagulation, before and after alteplase if applicable. Totals given as number (percentage) or median (interquartile range). Abbreviations: LMWH: low molecular weight heparin, ppx: prophylactic, tx: treatment, mm: millimeters
